# Supplementary material
Source: publisher site journal article supplement (https://www.dovepress.com/article/606599)
Supplement: Supplementary file 1 [file 606599_Supplement.docx]

**
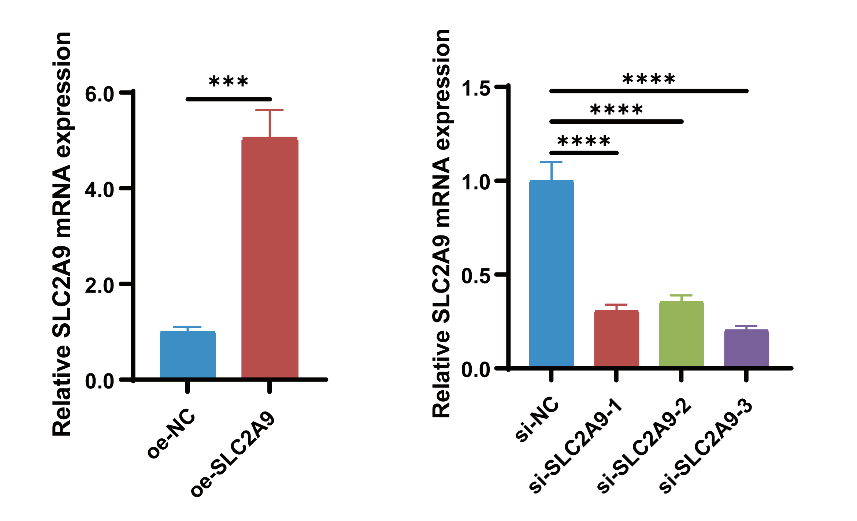
**

**Figure S1 Construction of SLC2A9 Overexpression and Knockdown Cell Models*****: P < 0.001, ****: P < 0.0001.

**Table S1 siRNA and overexpression plasmid sequences**

| Gene | SS Sequence | AS Sequence |
| --- | --- | --- |
| si-NC | UUCUCCGAACGUGUCACGUTT | ACGUGACACGUUCGGAGAATT |
| si-SLC2A9-1 | GGACCGAGGAGAAGAUGAAGA | UUCAUCUUCUCCUCGGUCCUU |
| si-SLC2A9-2 | CGAGGAGAAGAUGAAGAAAGU | UUUCUUCAUCUUCUCCUCGGU |
| si-SLC2A9-3 | CAGGUGCUAUCUACCUGUAUU | UACAGGUAGAUAGCACCUGUG |
| Gene | Primer sequence (5 '-3') | |
| pcDNA3.1(+)-SLC2A9-F | GCTCGGATCCGCCACCGCCACCATGGCAAGGAAACAAAATAGG | |
| pcDNA3.1(+)-SLC2A9-R | GATATCTGCAGAATTCTTAAGGCCTTCCATTTATC | |

**Table S2 qRT-PCR primer sequence**

| Gene | SS Sequence | AS Sequence |
| --- | --- | --- |
| SLC2A9 | GGCTCATGGGCCTCTTCTTT | GCCCAACAGCAAAGTTGGAG |
| GAPDH | TTCACCACCATGGAGAAGGC | GATGGCATGGACTGTGGTCA |

**Table S3 Antibody information**

| Antibody | Manufacturer | Product No. | Dilution Ratio |
| --- | --- | --- | --- |
| caspase3 | Affinity | DF6879 | 1：1000 |
| cleaved-caspase3 | Affinity | AF7022 | 1：1000 |
| Bcl-2 | Proteintech | 80313-1-RR | 1；5000 |
| Bax | Proteintech | 50599-2-Ig | 1：20000 |
| SLC2A9 | Proteintech | 26486-1-AP | 1：1000 |
| XDH | Proteintech | 55156-1-AP | 1：1000 |
| ABCG2 | Affinity | AF5177 | 1：1000 |
| GAPDH | Affinity | AF7021 | 1：10000 |
| Goat Anti-Rabbit IgG H&L (HRP) | HUABIO | HA1001 | 1:50000 |
| Goat Anti-Mouse IgG H&L (HRP) | HUABIO | HA1006 | 1:50000 |
